# Supplementary material for: A smartphone application to facilitate adherence to home-based exercise after flexor tendon repair: A randomised controlled trial
Source: PubMed Central journal article supplement (PMC7874382; doi:10.1177/0269215520962287), 2020-10-11
Supplement: Appendices.pdf [file Appendices.pdf]

## Appendix 1

### Sport Injury Rehabilitation Adherence Scale (SIRAS)

Circle the number that best indicates the accuracy with which this patient completed rehabilitation exercises since last appointment?

Minimum effort

Maximum  
effort

Since last appointment, how frequently did this patient follow your instructions and advice?

Never

always

How receptive was this patient to change in the rehabilitation program?

Very  
unreceptive

Very receptive

Brewer, W B. Preliminary psychometric evaluation of a measure of adherence to clinic-based sport injury rehabilitation. *Physical therapy in sport*. 2000;1:68-74.

## Appendix 2

Hur många gånger om dagen vill sjukgymnasten/arbetsterapeuten att du ska träna?

- Vet ej
- Var fjärde eller färre
- Var tredje timme
- Varannan timme
- Varje timme

Hur många gånger om dagen brukar du faktiskt träna?

- Vet ej
- Var fjärde timme eller färre
- Var tredje timme
- Varannan timme
- Varje timme

Med hur många repetitioner vill sjukgymnasten/arbetsterapeuten att du ska träna?

- Vet ej
- Ca 3 repetitioner
- Ca 5 repetitioner
- Ca 7 repetitioner
- 10 repetitioner eller mer

Med hur många repetitioner har du faktiskt tränat?

- Vet ej
- Ca 3 repetitioner
- Ca 5 repetitioner
- Ca 7 repetitioner
- 10 repetitioner eller mer

## Appendix 3

How many times a day did the physiotherapist want you to exercise?

- Do not know
- Every fourth hour or less
- Every third hour
- Every second hour
- Every hour

How many times a day have you been exercising?

- Do not know
- Every fourth hour or less
- Every third hour
- Every second hour
- Every hour

How many repetitions did the physiotherapist want you to complete during exercise?

- Do not know
- About 3 repetitions
- About 5 repetitions
- About 7 repetitions
- 10 repetitions or more

How many repetitions have you been completing?

- Do not know
- About 3 repetitions
- About 5 repetitions
- About 7 repetitions
- 10 repetitions or more

## Appendix 4

Hur många procent (%) av tiden upplever du att du har tränat korrekt? Markera på linjen med ett kryss.

0%

100%

## Appendix 5

For what percentage (%) of the time do you experience good quality exercise? Mark the line with a X.

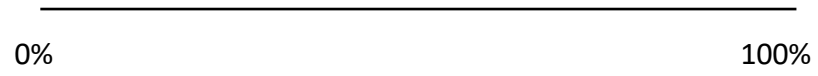

## Appendix 6

Swedish translation of the Athletic Injury Self-Efficacy Questionnaire.

Skatta på en skala från 0% till 100% i vilken grad du håller med om nedanstående påståenden. Markera med ett kryss på linjen.

Jag är säker på att jag kan..

1. utföra alla övningar i träningsprogrammet

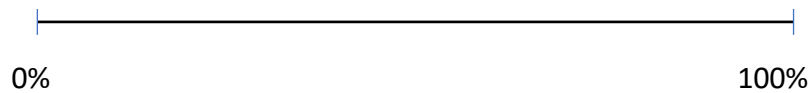

2. följa instruktionerna från min fysioterapeut

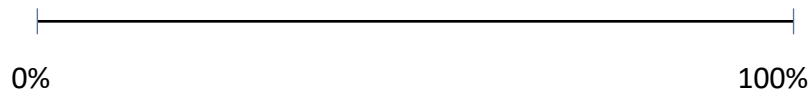

3. komma ihåg alla mina övningar

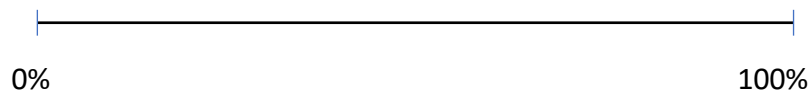

4. genomföra hela mitt träningsprogram även om jag är trött

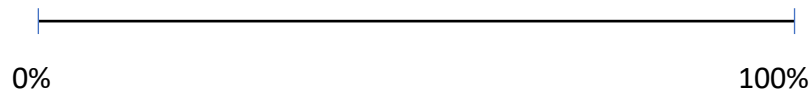

5. genomföra mitt träningsprogram även om jag känner mig nedstämd

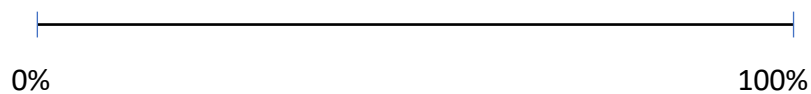

6. genomföra mitt träningsprogram även när jag har ont om tid

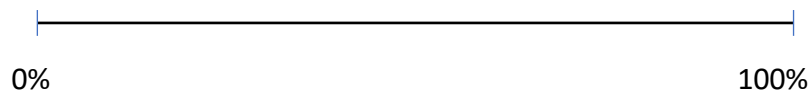

7. genomföra mitt träningsprogram även om jag känner viss obehagskänsla

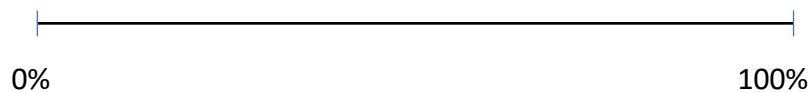

8. genomföra mitt träningsprogram regelbundet oavsett vad som händer

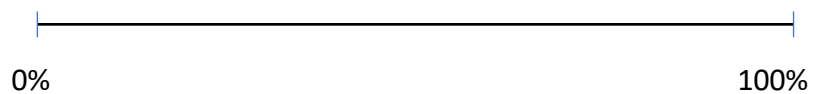

9. följa träningsprogrammet enligt det schema som jag fått av min fysioterapeut

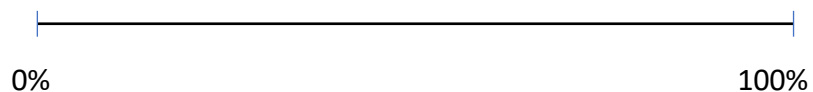

10. övervinna alla hinder som kan hindra mig från att utföra mitt träningsprogram regelbundet

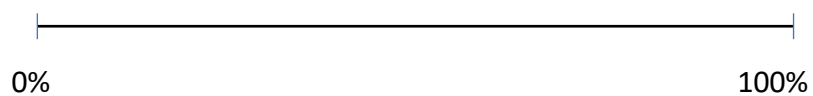

Wesch N, Hall C, Prapavessis H, Maddison R, Bassett S, Foley L, et al. Self-efficacy, imagery use, and adherence during injury rehabilitation. *Scand J Med Sci Sports*. 2012;22(5):695-703.
